# Supplementary material for: Environmental applications of an ultrasonically synthesized and PEG assisted Yb 2 O 3 /ZnFe 2 O 4 nanocomposite for dye and herbicide degradation and electrochemical sensing of catechol
Source: Royal Society of Chemistry journal article supplement (doi:10.1039/d5dt02596f), 2026-01-01
Supplement: d5dt02596f1.pdf [file d5dt02596f1.pdf]

### Supplementary Information

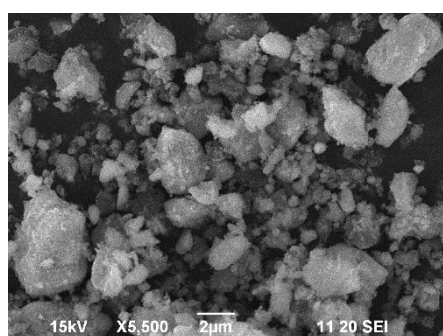

(a)

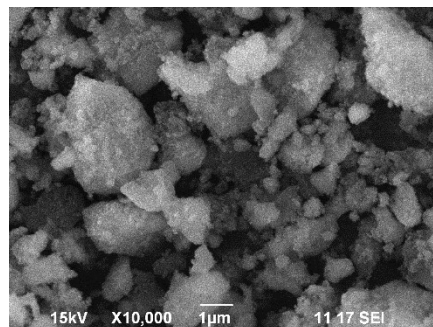

(b)

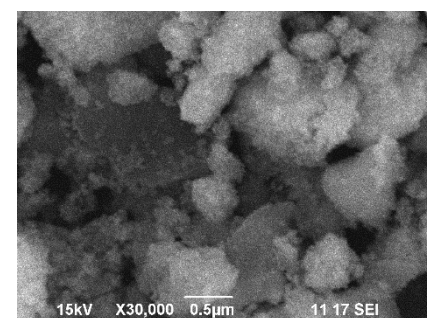

(c)

**Fig. S1** SEM images of Yb<sub>2</sub>O<sub>3</sub> NPs at (a) ×5,000 magnification, (b) ×10,000 magnification, and (c) ×30,000 magnification

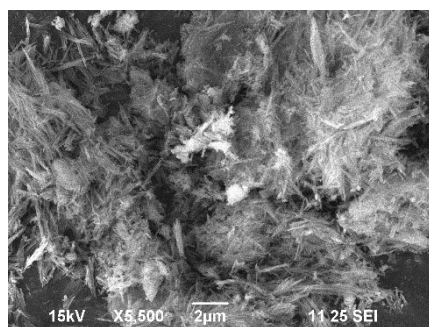

(a)

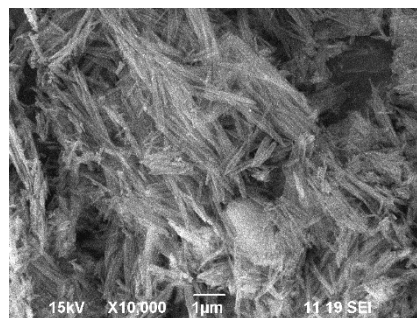

(b)

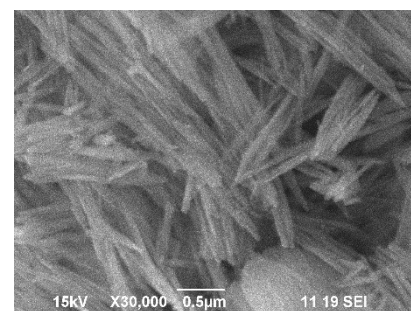

(c)

**Fig. S2** SEM images of ZnFe<sub>2</sub>O<sub>4</sub> NPs at (a) ×5,000 magnification, (b) ×10,000 magnification, and (c) ×30,000 magnification

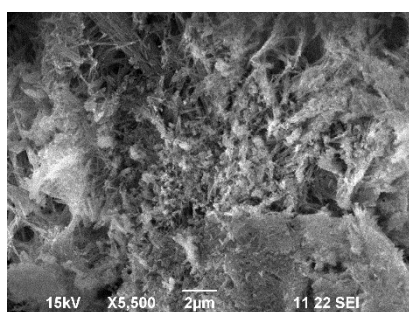

(a)

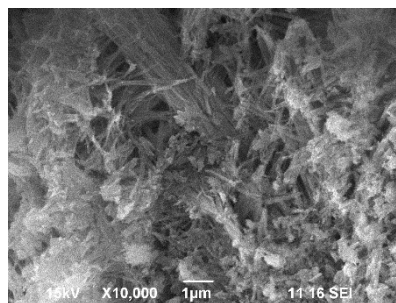

(b)

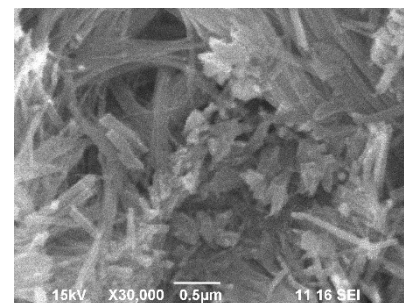

(c)

**Fig. S3** SEM images of Binary nanocomposite at (a) ×5,000 magnification, (b) ×10,000 magnification, and (c) ×30,000 magnification
